# Supplementary material
Source: bioRxiv or medRxiv preprint supplement (https://www.biorxiv.org/highwire/filestream/79748/field_highwire_adjunct_files/1/260216-2.pdf)
Supplement: Supplementary file [file 260216-2.pdf]

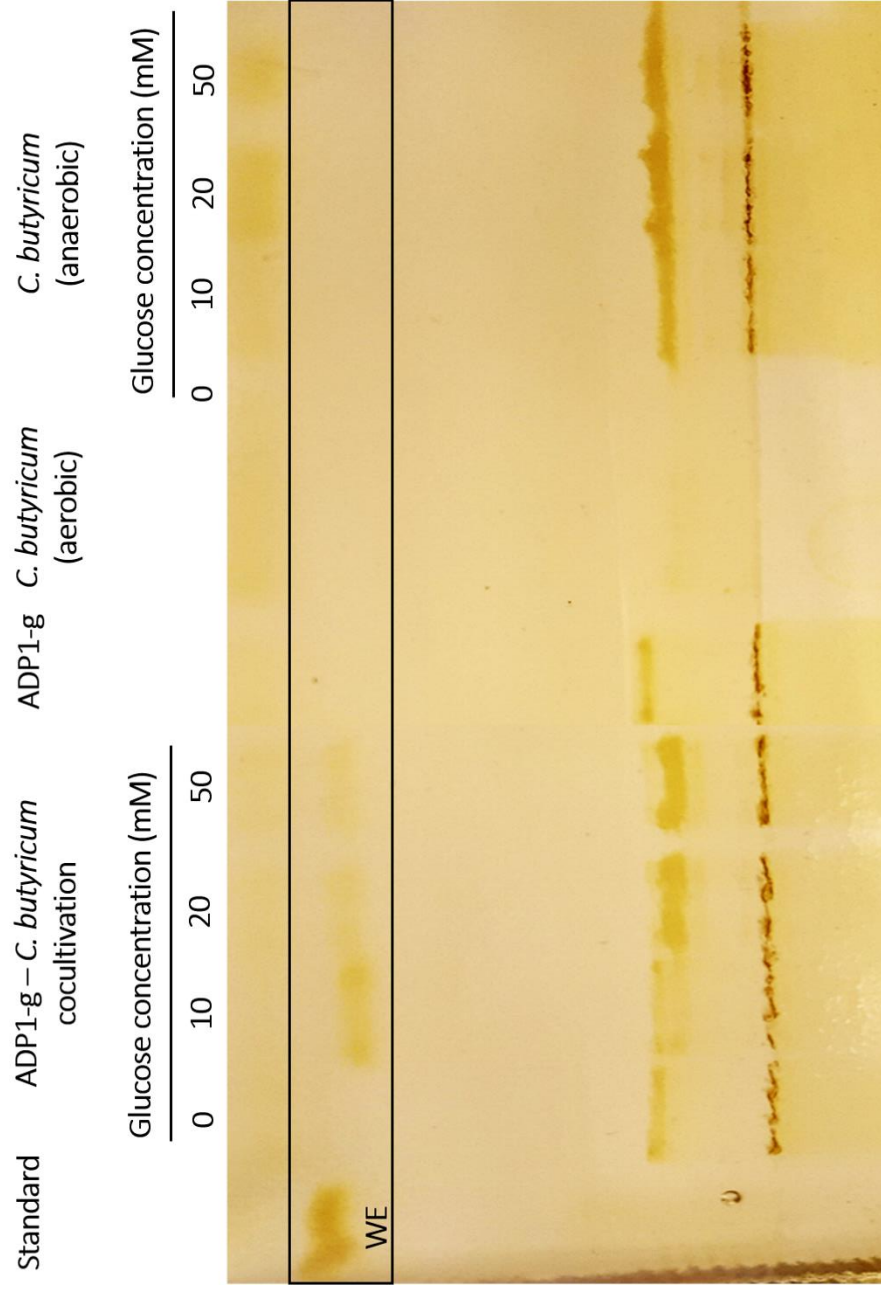

**Figure S1. Thin layer chromatography analysis of wax ester production from pure cultures of ADP1-g, *C. butyricum* and their cocultures when grown in aerobic and anaerobic JM medium containing varying glucose amounts.**
